# Supplementary material for: Yes-associated protein contributes to magnesium alloy-derivedinflammation in endothelial cells
Source: PubMed Central journal article supplement (PMC9039498; doi:10.1093/rb/rbac002), 2022-01-20
Supplement: rbac002_supplementary_data.pdf [file rbac002_supplementary_data.pdf]

Supplementary information

## **Yes-associated Protein Contributes to Magnesium Alloy-derived Inflammation in Endothelial Cells**

Hongchi Yu<sup>1,3</sup>, Zhe Hou<sup>1</sup>, Nuoya Chen<sup>1</sup>, Rifang Luo<sup>1</sup>, Li Yang<sup>1</sup>, Michael Miao<sup>4</sup>, Xiaoyi Ma<sup>2</sup>, Lifeng Zhou<sup>2</sup>,  
Fugui He<sup>2</sup>, Yang Shen<sup>3</sup>, Xiaoheng Liu<sup>3\*</sup>, Yunbing Wang<sup>1\*</sup>

\*: Corresponding authors

The supplementary materials are listed as below:

**Supplemental Figure 1.** Mg alloy promotes inflammatory genes expression.

**Supplemental Figure 2.** AZ-31 induces inflammatory response in tissue and HCAECs.

**Supplemental Figure 3.** The mRNA expression of transcriptional factors and co-transcriptional factors in inflammatory HCAECs.

**Supplemental Figure 4.** YAP modulates mRNA expression of inflammatory genes by binding to different DNA regions.

**Supplemental Table 1.** The inflammatory genes in heatmap.

**Supplemental Table 2.** Antibody list.

**Supplemental Table 3.** Silencing YAP target sequence.

**Supplemental Table 4.** Primer list.

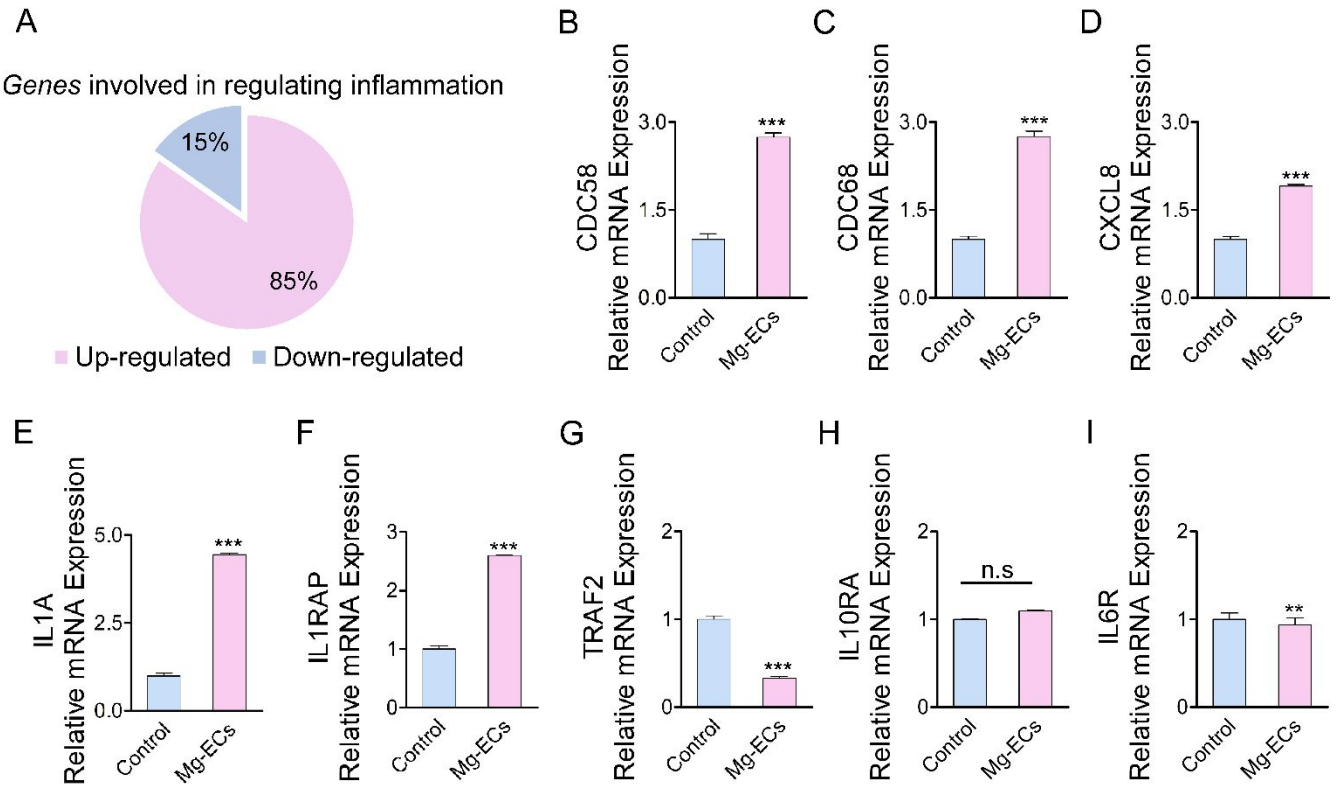

**Supplemental Fig 1. Mg alloy promotes inflammatory genes expression.** (A) The fraction of differently expressed genes associated with inflammation from mRNA-seq data. (B-I) The validation of genes related to inflammation from RNA-seq data was conducted by qRT-PCR analysis (n=3). Data are expressed as mean  $\pm$  S.D, *P*-values were calculated according to two-tailed unpaired t-test, n.s means none significance, \*\**P* < 0.01, \*\*\**P* < 0.001.

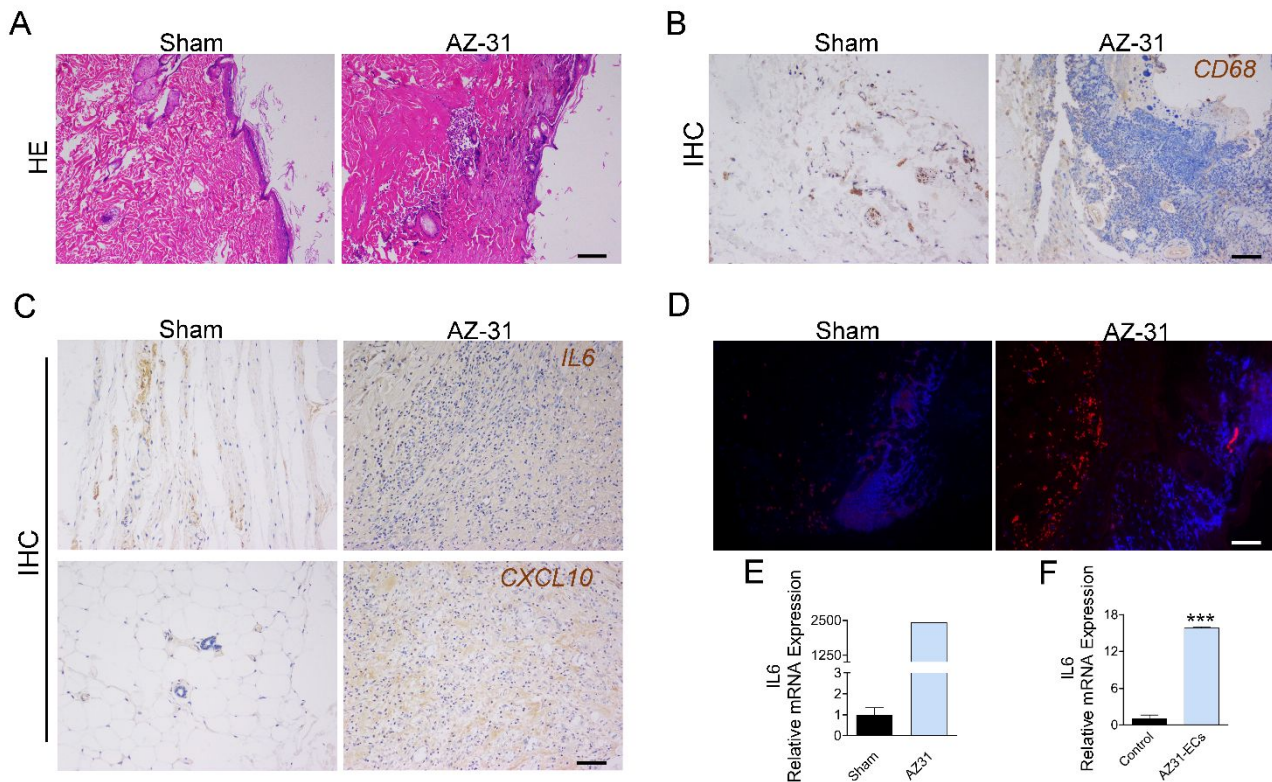

**Supplemental Fig 2. AZ-31 induces an inflammatory response in tissue and HCAECs.** (A) HE staining of subcutaneous tissue from rat with AZ-31 disc implantation, Scale bar, 50  $\mu$ m. (B) Immunohistochemical staining of CD68 from subcutaneous tissue with AZ-31 disc implantation, Scale bar, 50  $\mu$ m. (C) Immunohistochemical staining of IL6 and marker of I -type macrophage CXCL10 from the tissue around AZ-31 disc at 2 weeks post-implantation, Scale bar, 50  $\mu$ m. (D) Immunostaining showed higher expression of IL-6, Scale bar, 50  $\mu$ m. (E, F) qRT-PCR analysis of *IL6* in subcutaneous tissue with AZ-31 disc implantation and AZ31-ECs (n=3). All the tissue and cell samples were obtained at 2 weeks after exposure to AZ-31. Data are shown as mean  $\pm$  S.D, *P*-values were calculated according to a two-tailed unpaired t-test, \*\*\**P* < 0.001.

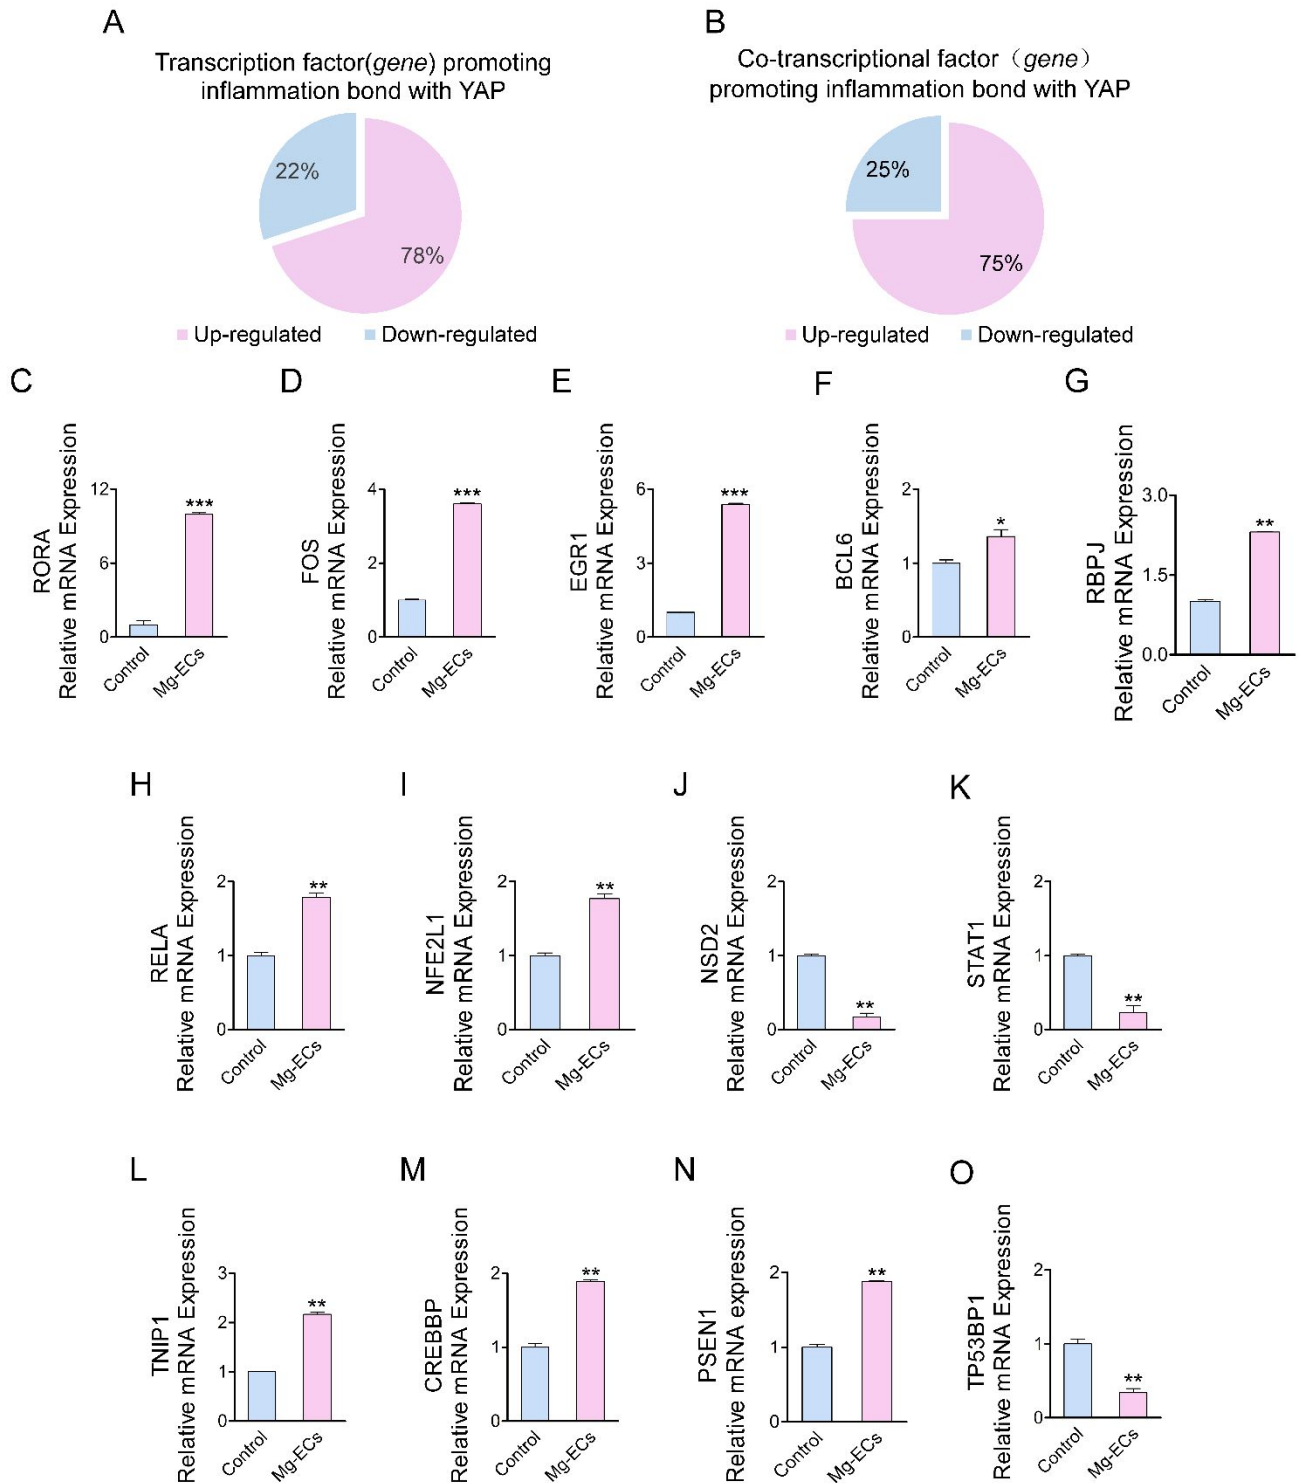

**Supplemental Fig 3. The mRNA expression of YAP-targeted transcriptional factors and co-transcriptional factors in inflammatory HCAECs.** (A) The fraction of YAP-targeted transcriptional factors related to inflammation after subjecting to Mg alloy is evaluated. (B) The fraction of YAP-targeted co-transcriptional factors related to inflammation after subjecting to Mg alloy is evaluated. (C-K) qRT-PCR analysis of YAP-targeted transcriptional factors related to inflammation. (L-O) qRT-PCR analysis of YAP-targeted co-transcriptional factors related to inflammation (n=3). Data are displayed as mean  $\pm$  S.D, *P*-values were calculated according to a two-tailed unpaired t-test, \**P* < 0.05, \*\**P* < 0.01, \*\*\**P* < 0.001.

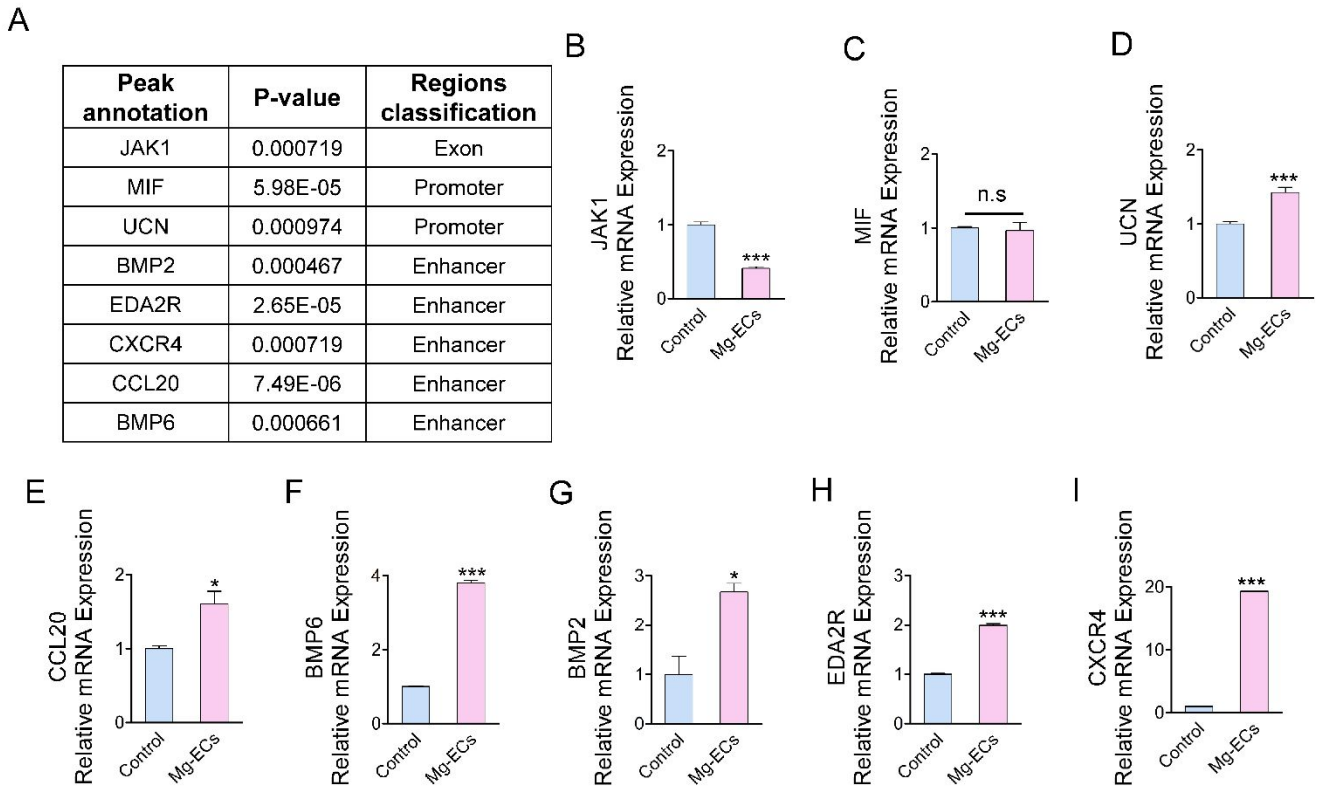

**Supplemental Fig 4. YAP modulates mRNA expression of inflammatory genes by binding to different DNA regions.** (A) The list of different DNA regions of several YAP-targeted inflammation genes. (B-I) qRT-PCR analysis of YAP-targeted inflammation genes. Data are presented as mean  $\pm$  S.D, *P*-values were calculated according to a two-tailed unpaired t-test, \**P* < 0.05, \*\**P* < 0.01, \*\*\**P* < 0.001.

**Supplemental Tab 1. The inflammatory genes in heatmap**

| Gene Name | Fold Change (up-regulated) | Gene Name | Fold Change (up-regulated) |
|-----------|----------------------------|-----------|----------------------------|
| CRLF2     | 6.435038811                | SOX9      | 2.456554422                |
| APOL2     | 6.310943923                | DSP       | 2.425041151                |
| ALDOC     | 5.705210879                | GBP2      | 2.419860553                |
| SLC2A3    | 4.989788546                | MUC3A     | 2.375606999                |
| F3        | 4.646603618                | CCL20     | 2.375038376                |
| TNFRSF10D | 3.979881311                | PSAP      | 2.362875731                |
| TNFAIP6   | 3.857849378                | SFRP1     | 2.339136796                |
| QSOX1     | 3.840587487                | TNIP1     | 2.334500776                |
| PLAUR     | 3.829120693                | BMP2      | 2.333049062                |
| BMP6      | 3.763419792                | ACVR1     | 2.323221431                |
| CXCR4     | 3.580352812                | PTGES     | 2.316684381                |
| EGR1      | 3.485375451                | TNFRSF10B | 2.288292913                |
| MUC1      | 3.437202439                | AMPD3     | 2.276531927                |
| EEF1A1    | 3.367715404                | ULBP2     | 2.261471512                |
| LRP1      | 3.3153233                  | LGALS1    | 2.259963674                |
| CD55      | 3.315237502                | PKM       | 2.256902211                |
| PRKCA     | 3.285778428                | HDAC5     | 2.248254638                |
| RBCK1     | 3.243351482                | GRN       | 2.240760797                |
| CDA       | 3.173551187                | ATP6V0C   | 2.235992466                |
| CD68      | 3.100880982                | IL10RB    | 2.199822905                |
| TCN1      | 3.055865313                | AXL       | 2.19517765                 |
| C5AR1     | 3.0480488                  | IRAK2     | 2.168277403                |
| UBC       | 3.032926946                | SUSD4     | 2.161266695                |
| IFI16     | 3.002469039                | TGFB1     | 2.146994552                |
| FOS       | 2.99895901                 | KDM6B     | 2.146551635                |
| IRF7      | 2.937342758                | SLAMF7    | 2.146033784                |
| CTSD      | 2.909170734                | ECM1      | 2.13289698                 |
| ALDOA     | 2.881677698                | APP       | 2.120378437                |
| NPC2      | 2.863207883                | EDA2R     | 2.115442283                |
| UBE2V1    | 2.820113892                | BST2      | 2.099676688                |
| GPI       | 2.769741768                | PTGS2     | 2.095865476                |
| NKX3-1    | 2.735755599                | STBD1     | 2.087038784                |
| CHST2     | 2.669641714                | IFNE      | 2.07654283                 |
| CIB1      | 2.637667434                | BCL10     | 2.072501718                |
| HRH1      | 2.636921553                | RARA      | 2.065234093                |
| LGALS3    | 2.626668463                | S100P     | 2.051367267                |
| CDH17     | 2.555426533                | KLF2      | 2.032606569                |
| PRSS3     | 2.547352055                | MUC20     | 2.025922468                |
| ARHGEF2   | 2.5454548                  | TNIP2     | 2.024573814                |
| CD58      | 2.531493324                | BRI3      | 2.009689903                |
| RELB      | 2.52797006                 | BTN3A2    | 2.007652257                |
| TRPV1     | 2.499250749                | IL1RAP    | 2.00274016                 |
| CXCL8     | 2.487224646                | IST1      | 2.000452332                |
| KRT16     | 2.465551571                | ULBP1     | 1.992312946                |

|                  |                                   |                  |                                   |
|------------------|-----------------------------------|------------------|-----------------------------------|
| NEU1             | 2.46045321                        | YPEL5            | 1.965163895                       |
| <b>Gene Name</b> | <b>Fold Change (up-regulated)</b> | <b>Gene Name</b> | <b>Fold Change (up-regulated)</b> |
| TRIM8            | 1.951042497                       | ANO6             | 1.653641977                       |
| DNASE1L1         | 1.942563365                       | ATP6V1D          | 1.651301219                       |
| F2RL1            | 1.923215927                       | GREM1            | 1.645635086                       |
| DOK3             | 1.920956894                       | DDRGK1           | 1.641239634                       |
| CLEC4E           | 1.909419174                       | ARL8A            | 1.638933714                       |
| IL1A             | 1.884755674                       | ITGAX            | 1.634521967                       |
| MANBA            | 1.867931287                       | ANPEP            | 1.629205454                       |
| RAB6A            | 1.867102109                       | C1RL             | 1.624629478                       |
| PLA2G4C          | 1.862752326                       | CTSA             | 1.623788094                       |
| CD63             | 1.859589381                       | IGBP1            | 1.603553448                       |
| ADORA2A          | 1.842497136                       | RBPJ             | 1.603013013                       |
| EEF2             | 1.83211164                        | TRIM52           | 1.595648684                       |
| CEBPG            | 1.829582079                       | KCMF1            | 1.586716242                       |
| CSTB             | 1.827360017                       | RHOG             | 1.585640034                       |
| CST3             | 1.825346978                       | TNFRSF10A        | 1.584607248                       |
| PNMA1            | 1.821343741                       | PDPK1            | 1.575350113                       |
| VAMP2            | 1.816926493                       | DNAJC3           | 1.563457994                       |
| IRAK1            | 1.810550539                       | TNFRSF11A        | 1.563332656                       |
| CCL5             | 1.803251536                       | DBNL             | 1.557454277                       |
| TIMP1            | 1.787132704                       | NFE2L1           | 1.55639106                        |
| ASAH1            | 1.781258702                       | TFPI             | 1.554310791                       |
| EXOSC6           | 1.78085968                        | CREBBP           | 1.545589218                       |
| TICAM1           | 1.780788099                       | MYD88            | 1.54214606                        |
| LAMTOR3          | 1.78074285                        | ARSA             | 1.539584372                       |
| PYGL             | 1.777414988                       | RELA             | 1.536147564                       |
| SPHK1            | 1.77264455                        | MILR1            | 1.534004181                       |
| PYGB             | 1.761451245                       | QPCT             | 1.532792084                       |
| MAPK14           | 1.755460825                       | AGER             | 1.53000457                        |
| S100A11          | 1.740039418                       | IKBKG            | 1.527893868                       |
| SDCBP            | 1.73833869                        | TSC1             | 1.526465065                       |
| GLIPR1           | 1.737518478                       | SPTAN1           | 1.52024451                        |
| MIF              | 1.734607864                       | HGSNAT           | 1.519670701                       |
| TMBIM1           | 1.730962681                       | RPS3             | 1.517730783                       |
| KMT2E            | 1.722250969                       | TRIM13           | 1.517624051                       |
| UCN              | 1.71310733                        | TERF2IP          | 1.516739086                       |
| SCN9A            | 1.712695257                       | RAP1B            | 1.515947636                       |
| FTH1             | 1.709199405                       | PSEN1            | 1.510164033                       |
| CSF2             | 1.708969                          | AOC3             | 1.509257745                       |
| TOM1             | 1.702341773                       | BCL6             | 1.506574449                       |
| MAP3K3           | 1.699488062                       | VAT1             | 1.503270119                       |
| CTSS             | 1.695364003                       | MAGT1            | 1.50264145                        |
| RAP2B            | 1.689029921                       |                  |                                   |
| LAMP2            | 1.676387148                       |                  |                                   |
| RORA             | 1.673659265                       |                  |                                   |
| TNFRSF10C        | 1.663937509                       |                  |                                   |

|                  |                                     |                  |                                     |
|------------------|-------------------------------------|------------------|-------------------------------------|
| PELI2            | 1.663490303                         |                  |                                     |
| <b>Gene Name</b> | <b>Fold Change (down-regulated)</b> | <b>Gene Name</b> | <b>Fold Change (down-regulated)</b> |
| EXO1             | 0.244680667                         | NECTIN2          | 0.529708285                         |
| STAT4            | 0.289057157                         | MLH1             | 0.538564813                         |
| RBP4             | 0.302323357                         | ADA              | 0.552659989                         |
| MSH2             | 0.318834913                         | IL6R             | 0.554371524                         |
| PRKDC            | 0.346939506                         | PTPN6            | 0.568468236                         |
| ATAD5            | 0.366322087                         | TRAF2            | 0.569655929                         |
| NSD2             | 0.372151638                         | NBN              | 0.569664921                         |
| UNG              | 0.406045097                         | PAXIP1           | 0.616380687                         |
| MSH6             | 0.409780137                         | MALT1            | 0.629773936                         |
| HMGB1            | 0.422201481                         | ZC3H12A          | 0.641091739                         |
| STAT1            | 0.451952901                         | HSPD1            | 0.643862194                         |
| DOCK10           | 0.463546909                         | HFE              | 0.645835646                         |
| GCNT3            | 0.475445944                         | TP53BP1          | 0.65941151                          |
| PRKCQ            | 0.510614209                         | RIF1             | 0.661083311                         |
| JAK1             | 0.514279154                         | EIF2AK4          | 0.664302909                         |
| NFKBID           | 0.516531299                         |                  |                                     |



**Supplemental Tab 2. Antibody list**

| Antibody information      |                           |                |              |                   | Dilution/amount |                           |                           |       |        |
|---------------------------|---------------------------|----------------|--------------|-------------------|-----------------|---------------------------|---------------------------|-------|--------|
| Antibody                  | Company                   | Catalog Number | Clone number | Description       | Western Blot    | ChIP-seq                  | ChIP-qPCR                 | Co-IP | IF     |
| anti-β-actin<br>( Human ) | Cell Signaling Technology | #3700          | 8H10D10      | Mouse monoclonal  | 1:1000          |                           |                           |       |        |
| anti-CDC42                | Abcam                     | ab187643       | EPR15620     | Rabbit monoclonal | 1:10000         |                           |                           |       | 1:200  |
| anti-RhoA                 | Abcam                     | ab187027       | EPR18134     | Rabbit monoclonal | 1:5000          |                           |                           |       | 1:150  |
| anti-RAC1                 | Abcam                     | ab33186        | 23A8         | Mouse monoclonal  | 1:1000          |                           |                           |       | 1:50   |
| anti-Paxillin             | Abcam                     | ab32084        | Y113         | Rabbit monoclonal | 1:5000          |                           |                           |       | 1:200  |
| anti-Vinculin             | Abcam                     | ab129002       | EPR8185      | Rabbit monoclonal | 1:10000         |                           |                           |       | 1:200  |
| anti-YAP                  | Cell Signaling Technology | #14074         | D8H1X        | Rabbit monoclonal | 1:1000          |                           |                           |       | 1:100  |
| anti-YAP1                 | Abcam                     | ab52771        | EP1674Y      | Rabbit monoclonal |                 | 5ug/10 <sup>6</sup> cells | 5ug/10 <sup>6</sup> cells |       |        |
| anti-MST1                 | Cell Signaling Technology | #3682          |              | Rabbit polyclonal | 1:1000          |                           |                           |       |        |
| anti-LATS1                | Cell Signaling Technology | #3477          | C66B5        | Rabbit monoclonal | 1:1000          |                           |                           |       |        |
| anti-Ki-67                | Cell Signaling Technology | #9449          | 8D5          | Mouse monoclonal  |                 |                           |                           |       | 1:800  |
| anti-FAK                  | Abcam                     | ab40794        | EP695Y       | Rabbit monoclonal | 1:1000          |                           |                           |       | 1:250  |
| anti-p-FAK                | Abcam                     | ab81298        | EP2160Y      | Rabbit monoclonal | 1:1000          |                           |                           |       | 5μg/ml |

| <b>Silencing YAP target sequence</b> |          |        |                       |
|--------------------------------------|----------|--------|-----------------------|
| Clone Name                           | Location | Length | Target Sequence       |
| shYAP21                              | 857      | 21     | GCTCAGCATCTTCGACAGTCT |
| shYAP22                              | 920      | 21     | GAGATGGCAAAGACATCTTCT |
| shYAP23                              | 1051     | 21     | GCAGAATATGATGAACTCGGC |
| shYAP24                              | 1103     | 21     | GCCATGACTCAGGATGGAGAA |
| TR001                                |          | 19     | GTTTCGCGCCGTAGTCTTA   |

**Supplemental Tab 3. Silencing YAP target sequence**

**Supplemental Tab 4. Primer list**

| <b>List of primers used for RT-qPCR (RAT)</b> |                         |                         |                   |
|-----------------------------------------------|-------------------------|-------------------------|-------------------|
| Target transcript                             | Forward primer(5'-3')   | Reverse primer(5'-3')   | Product size (bp) |
| GAPDH(RAT)                                    | GCTCTCTGCTCCTCCCTGTTCTA | TGGTAACCAGGCGTCCGATA    | 124               |
| Lats1                                         | TGATGCGGGTTGGATTAT      | ATGCTCCTATTCCCTAATGTCTT | 144               |
| Yap1                                          | GACAACAACATGGCAGGACC    | GGCTTGCTCCCATCCATC      | 133               |
| Mst1                                          | GACTTATCATCCCGAACAGA    | CGACCTTGTTAATCCAGTCC    | 93                |
| IL6                                           | TCAGAGCAATACTGAAACCCTA  | TCCTTAGCCACTCCTTCTGT    | 134               |
| IL10                                          | CTGCTATGTTGCCTGCTCT     | ATGCTCCTTGATTTCTGGG     | 309               |

| <b>List of primers used for RT-qPCR (Human)</b> |                           |                             |                   |
|-------------------------------------------------|---------------------------|-----------------------------|-------------------|
| Target transcript                               | Forward primer(5'-3')     | Reverse primer(5'-3')       | Product size (bp) |
| $\beta$ -actin(Human)                           | GTGGCCGAGGACTTTGATTG      | CCTGTAACAACGCATCTCATATT     | 73                |
| GAPDH(Human)                                    | GGGAAACTGTGGCGTGAT        | GAGTGGGTGTCGCTGTTGA         | 299               |
| CXCR4                                           | CACGCCACCAACAGTCAGA       | GACAATACCAGGCAGGATAAGG      | 225               |
| CXCL8                                           | CATACTCCAAACCTTTCCACC     | ACTTCTCCACAACCTCTGC         | 159               |
| JAK1                                            | CTGGGAAATCTGCTACAATGG     | TGATGGCTCGGAAGAAAGG         | 176               |
| IL6R                                            | GCCAGTAGTGTCGGGAGCAA      | CCATCCATGTTGTGAATGTCTTTG    | 226               |
| TRAF2                                           | GGGACCCTGAAAGAATACGAGA    | CGCAGCCGTCACAAGTTAAG        | 232               |
| CD58                                            | ATACAGTGTACTCTTAGCAATCCAT | GTCACATTTTCAGAATACCATTTCATA | 171               |
| IL10RB                                          | GGGTCGTGTGCTTGGAGG        | CTGACATTTTCGGGAGGTGG        | 128               |
| IL1RAP                                          | AGAACAGAAGATGAAACAAGAACTC | TGCTTCACCTTGGCTGCT          | 131               |
| CD68                                            | CCTGCTTCTCTCATTCCCCTAT    | GGACACATTGTACTIONCCACCGC    | 106               |
| IL1A                                            | TTCAAGGAGAGCATGGTGGT      | TGAGGGCGTCATTTCAGGAT        | 223               |
| CCN2                                            | CTTCGGTGGTACGGTGTA        | GCTCTAATCATAGTTGGGTCT       | 279               |
| AREG                                            | CCCAAAACAAGACGGAAAGTG     | ATGTTACTGCTTCCAGGTGCTC      | 177               |
| CCL20                                           | GCGCAAATCCAAAACAGAC       | CCATTCCAGAAAAGCCACA         | 94                |
| BMP2                                            | CGTGCTTCTTAGACGGACTG      | GCAGCAACGCTAGAAGACA         | 77                |
| EDA2R                                           | AGTTGTTCTCTCTGGACTCTGTTC  | ATGCTCCAGATCAGTCCCTGT       | 154               |
| BCL6                                            | AGCCTGAGAACCTTGACC        | CCCGTCATGGACCTGTTA          | 112               |
| BMP6                                            | GTCGTAATCGCTCTACCCAGTC    | TGGTTGGTTGCATTCATGTG        | 223               |
| MIF                                             | GGCAAGCCCCCCCAGTAC        | TGTCGTAATAGTTGATGTAGACCCTG  | 211               |
| UCN                                             | TCTGTCCATTGACCTCACCTTTC   | CCATCACTTGCCACCGA           | 121               |

|         |                          |                           |     |
|---------|--------------------------|---------------------------|-----|
| MST1    | CCCGTAGGGACAGGTTTCAC     | CCGGAGCACTTGGAAGTCAT      | 162 |
| LATS1   | AGCACCTACACACCCTTCTTG    | GTGGCATCACAGTCACATTTG     | 98  |
| YAP1    | GCCAGCAGGTTGGGAGAT       | TGTGATTAAAGAAGTATCTCTGACC | 59  |
| CDC42   | GATTACGACCGCTGAGTT       | GAGTTATCTCAGGCACCC        | 111 |
| RhoA    | AAGATGGCATAACCTGTCTCA    | TGGGAGGGAACCTGGATA        | 90  |
| RAC1    | GGAGACGGAGCTGTAGGT       | AGTAGGGATATATTCTCCAGGA    | 78  |
| PXN     | GAGAAGCCTAAGCGGAATGG     | AGATGCGTGTCTGCTGTTGG      | 175 |
| VCL     | CAGACCTGCTCCTTACCTTCG    | AACTCTTTCACGGGTGTTTCATCG  | 244 |
| TLN1    | AAGGAGTATGTGAAGCAGAAGGGA | CAGCGTTTGATGTTGGTGAGGT    | 275 |
| IL6     | TGAGGAGACTGCCTGGTGAA     | GGTTGGGTCAGGGGTGGTTA      | 190 |
| IL10    | GCCCTTGAGAAACCTTATTGT    | GGCTTCTTCTAAATCGTTCACAG   | 115 |
| Mettl3  | ACAGAGTGTCCGAGGTGATT     | TGTAGTACGGGTATGTTGAGC     | 201 |
| Mettl14 | CCCATGTACTTACAAGCCGATAT  | CCCCATTTTCGTAAACACACTC    | 257 |
| Wtap    | CCTCTTCCCAAGAAGGTTTCGAT  | GTTCTTGGTTGCTAGTCCG       | 238 |
| Fto     | AATAGCCGCTGCTTGTGAG      | CCACTTCATCTTGTCCGTTG      | 182 |
| EGR1    | CGAGCAGCCCTACGAGCAC      | GGGAAAAGCGGCCAGTATAG      | 137 |
| FOS     | TTTGCTAACCGCCACGAT3      | CTGCGGGTGAGTGGTAGTAAGAG   | 120 |
| RORA    | TTCTTTCCTACTGTTCTGTTCA   | CTCAAGTATTGGCAGGTTTCC     | 119 |
| RBPJ    | ATTCACAGTCCGAGATGGCT     | GCGGTCTGCTTATCAACTTC      | 114 |
| NFE2L1  | TTCCAGCATAACAGAAGCAGTG   | CTGTAGTTGGTGCTCAGTGGGT    | 222 |
| RELA    | TGCCGAGTGAACCGAAAC       | TCCCGTGAATACACCTCAA       | 102 |
| NSD2    | CACGAAGCAGGAAGGGAGAT     | GGCAAACCTGGTGTTGTAGCG     | 176 |
| STAT1   | TTTGCTGTATGCCATCCTCG     | CACTGAGACATCCTGCCACCT     | 157 |
| TNIP1   | TGGAGGAGACCGACAAGGAG     | CAAATGCTGTTGGTGGAGATG     | 195 |
| CREBBP  | CAGAACCAATGGAAGTGGATGA   | CGAAGGAGATGTTGACTGAGAG    | 107 |
| PSEN1   | TCCAATTTCGTATGCTGGTTGA   | CAGGTGTAGAGCGATGAGGC      | 269 |
| TP53BP1 | TGTATCACCACAAGCCTCAAC    | TCTCCATCTTCTTCCCATCA      | 156 |

| <b>List of primers used for ChIP-PCR (Human)</b> |                          |                         |                   |
|--------------------------------------------------|--------------------------|-------------------------|-------------------|
| Target transcript                                | Forward primer           | Reverse primer          | Product size (bp) |
| ANKRD1                                           | AAAAAGGGCAGTGATGTGGTG    | GAAGAGGGAGGGGAGGACAA    | 171               |
| AMOTL2                                           | TGCCAGGAATGTGAGAGTTTC    | AGGAGGGAGCGGGAGAAG      | 108               |
| CTGF                                             | CTTTGGAGAGTTTCAAGAGCC    | TCTGTCCACTGACATACATCC   | 150               |
| IL10                                             | GTAGGGATAGGTAAGAGGAAAGTA | TCTCCAGCACATAGAATGAAAC3 | 187               |
| IL6                                              | CAAGCCTGGGATTATGAAGAAGG  | AGCACTGGCAGCACAAGGCAAAC | 312               |
| METTL3                                           | CGTATTTGAAGACCTCTCGGAT   | CAACGGTGGTCCCCAATCT     | 128               |
| METTL14                                          | GGGAAGAAGCCAAAAAATGC     | ACGCAGGTAACAGCCACAAC    | 102               |
| WTAP                                             | CAGAGATGTCAAGGAGGAACGA   | TGAGAACTTAGAAACCGATGCC  | 88                |
| FTO                                              | CATATCCTTGTGAGGCTGTTACTC | CATCCCGCTTCTTGTGTGT     | 152               |
| RORA                                             | TTAGTTTCTCCTCAGCCCTCG    | TGAGATGATTCCGTGCCTACTT  | 158               |
| RBPJ                                             | GTGTAGCGTGAGACTGGACTGC   | CGCCCGAACCTGTTGAAG      | 97                |
| NFE2L1                                           | CACCTTCCCTATTCCCTGACCT   | GCCCTAGTGTCTGGCATTCT    | 152               |
| RELA                                             | GCCACTGGAGAACTGAAATGA    | CAGGCTCTGAAGAAACAGGAAG  | 78                |
| BCL6                                             | AGCAGTGGTAAAGTCCGAAGC    | GCAATAATCACCTGGTGTCCG3  | 124               |
| NSD2                                             | GCCACAACCTCAACCCATACAG3  | CCACAGTTCACCTCCTCTTCC   | 88                |

|         |                          |                        |     |
|---------|--------------------------|------------------------|-----|
| STAT1   | GTCTGGACCCTGACAACCTTA    | CCTCTGGCATTCTTTCTACATT | 75  |
| TNIP1   | TGACCTGGACCTGTTTATTTT    | CTGAGTAGACCAAGGGATTTG  | 78  |
| CREBBP  | CAGGTAAAGACCGTGGGTAGAG   | CTAAGCCAGAAACCCGTGAGT  | 79  |
| PSEN1   | CTCCCACAACCTTATCTTTCATTC | CCTTCACATTCCTATCGCATC  | 161 |
| TP53BP1 | TCATTGGCTGCTGCCTGTC      | CCCGCTCAAGTCTAAGTGGAA  | 168 |
| EGR1    | ACAGGTGGCAGAGGCAAGG      | GCTGGGAAATTGAGGATAGGAA | 85  |
| FOS     | AGACAGGAACTGCGAAATGCTC   | GTGTAAACGTCACGGGCTCAA  | 157 |
